# Supplementary material for: Tetraploidization-driven PRKG1 deletion reveals novel mechanisms underlying Leiomyosarcoma aggressiveness
Source: Research Square preprint supplement (doi:10.21203/rs.3.rs-6984264/v1), 2025-07-23
Supplement: Supplementary file 2 [file 35f33ad812349f4b72cb84e0.xlsx]

## Sheet: S Table 1
Gene	Sample	Sex	Gene_chromosome 1	Gene name 1	Break location 1	Break position 1 (hg38)	Sequence reading strand	Gene reading Strand	Gene_chromosome 2	Gene name 2	Break location 2	Break position 2 (hg38)	Sequence reading strand	Gene reading Strand	gDNA Sanger validation	RNA Sanger validation	cDNA nomenclature (product detected in RNAseq)	Protein nomenclature
PRKG1			Gene 1						Gene 2
	LMS55T	F	10	PRKG1	intron 2	51409618	(+)	(+)	?	Intergenic	X	?	?		No	-	-	-
	LMS80T	F	10	PRKG1	intron 3	51472357	(+)	(+)	10	ANXA8	intron 6	47475399	(-)	(-)	Yes	-	-	-
	LMS96T	F	10	PRKG1	intron 5	52030875	(+)	(+)	10	PRKG1	5'UTR	52295553	(+)	(+)	Yes	-	-	-
	LMS97T	M	22	Intergenic	X	31372679	(+)		10	PRKG1	intron 7	52108333	(+)	(+)	Yes	-	-	-
			10	PRKG1	intron 8	52138158	(+)	(+)	22	Intergenic	X	31989062	(-)		Yes
			10	PRKG1	intron 4	51876879	(+)	(+)	9	SLC44A1	intron 1	105266548	(-)	(+)	Yes	Yes	NM_006258.4: c.803_6615delinsACTATAA	p.(S233RfsX3)
	LMS108T	F	10	PRKG1	intron 2	51368387	(+)	(+)	10	PRKG1	intron 4	51888474	(+)	(+)	Yes	Yes	NM_006258.4: c.583_802del	p.(D160AfsX49)
	LMS117T	F	10	PRKG1	intron 2	51402317	(+)	(+)	10	PRKG1	intron 3	51534011	(+)	(+)	Yes	Yes	NM_006258.4: c.583_697del	p.(D160AfsX490)
Supplementary Table 1: structural variants detected in PRKG1 in the LMS cohort.
Chromosomal and genomic coordinates of gene breakpoint regarding the gene of interest and its fusion partners are indicated.
Nomenclatures of the alteration and its effect on RNA are indicated when there is an alternative RNA product detected by RNAseq. Only alternative RNA product with the gene of interest in first position where studied.
Predicted effect on protein is then indicated.
M: male, F: female, “-“: no alternative product detected.

## Sheet: S Table 2
Gene	Sample	Sex	Gene_chromosome 1	Gene name 1	Break location 1	Break position 1 (hg38)	Sequence reading strand	Gene reading Strand	Gene_chromosome 2	Gene name 2	Break location 2	Break position 2 (hg38)	Sequence reading strand	Gene reading Strand	gDNA Sanger validation	RNA Sanger validation	cDNA nomenclature (product detected in RNAseq)	Protein nomenclature
PRKG1	OC148	M	10	PRKG1	intron 2	?	(+)	(+)	10	PRKG1	intron 3	?	(+)	(+)	No	Yes	NM_006258.4: c.583_697del	p.(D160AfsX490)	Cell lines
	OC211	M	10	PRKG1	intron 3	?	(+)	(+)	10	PRKG1	intron 5	?	(+)	(+)	No	Yes	NM_006258.4: c.698_866del	p.(L199PfsX3)
	H2.1	F/M	10	PRKG1	intron 4	?	(+)	(+)	10	PRKG1	intron 5	?	(+)	(+)	No	Yes	NM_006258.4: c.698_866del	p.(L199PfsX3)
Supplementary Table 2: structural variants detected in PRKG1 in the cell lines.
Only deletion in PRKG1 gene could be detected by DNA array in cell lines. Introns in which each breakpoint occured are indicated.
Nomenclatures of the RNA product validated in Sanger sequencing. Predicted effect on protein is then indicated.
M: male, F: female.

## Sheet: S Table 3
Primer name	Primer sequence 5'-->3'	PCR program	Ref gene
LMS80BPPRKG1F1	ACATTCCCTTGCAGCTGTTT	TD60°C	NM_001098512.3 NM_006258.4
LMS80BPPRKG1F2	CACAAGTGGCTACCTGGAGA
LMS80BPPRKG1R1	TGGCATTCTTGTCTTTTGTTCCT
LMS80BPPRKG1R2	CTGCAGTTGGGACCCTCTAA
LMS96BPPRKG1F1	TGACTCAGCACAATCAATCACT
LMS96BPPRKG1F2	GTCCTTCACTGGCATGCC
LMS96BPPRKG1R1	TGTGTGGATCAATGACATTAGGG
LMS96BPPRKG1R2	TTCACACAGGGCCAAAACAG
LMS97BP1PRKG1F1	GATAGCTCACTCTGTCACCCA
LMS97BP1PRKG1F2	TGTTCCCACTCATATTTCATCCT
LMS97BP1PRKG1R1	CAGAGGTCAGGAGTTCGAGA
LMS97BP1PRKG1R2	TGGAAGCCAGGCAGAGTT
LMS97BP2PRKG1F1	TCACTGTGTTGCCTCTGAGA
LMS97BP2PRKG1F2	GTCTCCTCCCTTGTCCTCAC
LMS97BP2PRKG1R1	TTGCCAGATGTCACTTCCTT
LMS97BP2PRKG1R2	GGAGAATTGCTTGAACCTGGG
LMS97BP3PRKG1F1	AGACCAGCGAGAACTTGTGT
LMS97BP3PRKG1F2	AGGACTCACATAACCTGATTTCA
LMS97BP3PRKG1R1	AAGCAGATCTGAGCCAAGGA
LMS97BP3PRKG1R2	AGGTTTGAGGTACAGGTTGAGT
LMS108BPPRKG1F1	AGCATGCAGTCTTCAGGTCT
LMS108BPPRKG1F2	TCCCATCATACTGTACTGTGACA
LMS108BPPRKG1R1	TCCCATGAAGCTCCATCCAT
LMS108BPPRKG1R2	CACCATGGAGAAAGCTAGTGG
LMS117BPPRKG1F1	ACAGGGATCCATGTGTTCCT
LMS117BPPRKG1F2	AACTAAGGGCAAGAGATGGGA
LMS117BPPRKG1R1	GGTGGGTCTTAATTTTGCACC
LMS117BPPRKG1R2	TGGCCCAAATCCTATTTCCTTG
Supplementary Table 3: Genomic DNA primers used for breakpoints validation by Sanger sequencing.
Forward and reverse primers used for breakpoint (BP) validations on genomic DNA are presented. For each BP validation, the two primers used to detect the BP are the F1 and R2 primers, other primers were used to detect a potential reciprocal translocation. PCR was a touch-down 60°C program (TD 60°C) (2 cycles at a temperature of 60°C, followed by 2 cycles at 59°C, 2 cycles at 58°C, 3 cycles at 57°…

## Sheet: S Table 4
Characteristic	N= 147
Age_at_diagnosis	64 (57, 70)
Sex	NA
Female	110 (75%)
Male	37 (25%)
Size_of_tumour__mm	85 (60, 130)
Grade_of_tumour	NA
1	16 (11%)
2	45 (32%)
3	79 (56%)
Unknown	7
Margin_R	NA
Not evaluable	7 (5.2%)
R0	87 (64%)
R1	40 (30%)
R2	1 (0.7%)
Unknown	12
Chemotherapy	NA
Adjuvant	18 (15%)
Neoadjuvant	4 (3.2%)
Neoadjuvant + adjuvant	2 (1.6%)
No	95 (77%)
Palliative	5 (4.0%)
Unknown	23
Radiotherapy_of_tumour	NA
First	2 (1.4%)
No	92 (63%)
Second	43 (29%)
Third	9 (6.2%)
Unknown	1
Metastasis	78 (53%)
DEAD	51 (35%)
Supplementary Table 4: RNA seq. cohort of 147 LMS samples used for survival analysis

## Sheet: S Table 5
Primer name	Primer sequence 5'-->3'	PCR program	Ref gene
LMS97cDNAPRKG1F	AACTCTGGGCCATTGATCGA	TD60°C	NM_001098512.3 NM_006258.4
LMS97cDNAPRKG1R	GCATCCATGAATGAAAGTCTGC
PRKG1cDNAex2F	GAAGAACTTGGAGCTGTCGC
PRKG1cDNAex6R	GTGTCCCCTCTTGCACCTT
Supplementary Table 5: Primers used for PRKG1 fusion transcript validation by Sanger sequencing.
TD60°C PCR program described in Supplementary Table 3 legend was used. To validate the PRKG1 exons fusion in the cell lines and in LMS108T and LMS117T tumors, one pimer in exon 2 and one in exon 6 of the gene were used. Primers used for cDNA validation of fusion transcript in LMS97 are also presented. F: forward, R: reverse.

## Sheet: S Table 6
Primer name	Primer sequence 5'-->3'
PRKG1AXbaIF	GCTCTAGAGCCACCATGAGCGAGCTAGAGGA
PRKG1BXbaIF	GCTCTAGAGCCACCATGGGCACCTTGCGGGA
PRKG1ABSwa1R	GATCATTTAAATTTAGAAGTCTATATCCCATC
pCDH CMV F	CACGCTGTTTTGACCTCCATAGA
pCDH R	CTTCTCTAGGCACCCGTTCA
Supplementary Table 6: Primers used for PRKG1a and PRKG1b cDNA cloning.
The three first primers were used to amplified cDNA from the purchased vectors from SBI. The two last primers were used to check the colonies by PCR and to sequence the final vectors. F: forward, R: reverse.
